# Supplementary material
Source: MDPI journal article supplement (https://www.mdpi.com/2075-163X/12/5/512)
Supplement: s1 [file s1]

# Supplementary

## Major and Trace Elements in Human Kidney Stones: A Preliminary Investigation in Beijing, China

Yu Tian <sup>1</sup>, Guilin Han <sup>2,\*</sup>, Rui Qu <sup>2</sup> and Chunlei Xiao <sup>1</sup>

<sup>1</sup> Department of Urology, Peking University Third Hospital, Beijing 100191, China;  
tianyuy@bjmu.edu.cn (Y.T.); xiaochunleixcl@163.com (C.X.)

<sup>2</sup> Institute of Earth Sciences, China University of Geosciences (Beijing), Beijing 100083, China; qurui@email.cugb.edu.cn

\* Correspondence: hanguilin@cugb.edu.cn; Tel.: +86-10-82323536

**Table S1.** Major and trace elements of all kidney stones.

| NO | Gender | Age | Types           | Ca<br>% | Mg<br>mg/g | Na<br>μg/g | K<br>μg/g | Sr<br>μg/g | Zn<br>μg/g | Li<br>μg/kg | Ti<br>μg/kg | Cu<br>μg/kg | Se<br>μg/kg | Rb<br>μg/kg | Ba<br>μg/kg | Pb<br>μg/kg |
|----|--------|-----|-----------------|---------|------------|------------|-----------|------------|------------|-------------|-------------|-------------|-------------|-------------|-------------|-------------|
| 1  | Male   | 63  | CO              | 29.9    | 3.5        | 7317.9     | 410.3     | 287.2      | 1023.7     | 457.4       | 1163.7      | 284.8       | 136.8       | 291.3       | 5165.9      | 7955.2      |
| 2  | Male   | 51  | CO              | 26.0    | 0.1        | 2841.1     | 0.0       | 48.9       | 19.2       | 0.0         | 485.7       | 796.4       | 292.9       | 121.1       | 0.0         | 1385.7      |
| 3  | Male   | 53  | CO              | 16.0    | 0.1        | 1382.9     | 0.0       | 30.8       | 16.9       | 1.0         | 46.2        | 950.9       | 271.1       | 72.6        | 74.7        | 802.6       |
| 4  | Male   | 27  | CO              | 29.2    | 2.6        | 5411.9     | 1.9       | 149.4      | 457.9      | 475.0       | 1681.3      | 490.6       | 187.5       | 315.3       | 2265.6      | 11575.0     |
| 5  | Female | 39  | CO              | 25.1    | 0.2        | 2529.6     | 0.0       | 61.9       | 120.2      | 6.3         | 147.8       | 462.3       | 128.9       | 128.6       | 1632.1      | 3616.4      |
| 6  | Male   | 50  | CO              | 24.8    | 0.5        | 1864.3     | 0.0       | 88.8       | 172.2      | 28.9        | 348.4       | 758.1       | 198.6       | 90.1        | 265.3       | 14592.1     |
| 7  | Female | 56  | CO              | 23.7    | 0.2        | 1693.0     | 129.9     | 42.8       | 23.4       | 0.0         | 161.2       | 1021.0      | 16.4        | 280.1       | 58.4        | 988.3       |
| 8  | Female | 54  | CO              | 28.5    | 3.3        | 6244.2     | 272.0     | 238.3      | 568.8      | 428.6       | 1484.4      | 520.1       | 138.4       | 180.7       | 4516.7      | 9189.7      |
| 9  | Male   | 61  | CO              | 25.2    | 0.4        | 1818.3     | 118.4     | 54.4       | 22.2       | 7.4         | 166.7       | 627.8       | 107.4       | 143.4       | 336.1       | 3513.0      |
| 10 | Female | 56  | CO              | 27.2    | 1.0        | 3413.1     | 238.7     | 165.6      | 506.3      | 182.9       | 640.0       | 336.2       | 136.2       | 167.5       | 1924.8      | 6934.3      |
| 11 | Female | 61  | CO              | 26.6    | 2.2        | 3109.6     | 53.4      | 112.7      | 234.8      | 131.3       | 510.3       | 639.8       | 72.2        | 75.0        | 874.3       | 7093.8      |
| 12 | Male   | 41  | CO              | 28.1    | 0.9        | 2134.2     | 0.0       | 119.1      | 438.7      | 155.7       | 621.9       | 235.0       | 42.6        | 43.4        | 3160.5      | 8096.7      |
| 13 | Male   | 62  | CO              | 26.4    | 1.2        | 2927.8     | 0.0       | 248.7      | 474.9      | 158.7       | 713.0       | 450.0       | 43.5        | 47.6        | 2610.9      | 4834.8      |
| 14 | Male   | 48  | CO              | 29.9    | 1.0        | 3323.3     | 0.0       | 208.5      | 987.2      | 176.1       | 1213.1      | 267.1       | 85.2        | 141.8       | 3588.1      | 11338.1     |
| 15 | Male   | 31  | CO              | 26.5    | 0.3        | 1680.3     | 0.0       | 46.0       | 113.5      | 12.7        | 347.5       | 688.6       | 319.9       | 40.0        | 163.1       | 3349.6      |
| 16 | Female | 61  | CO              | 26.7    | 1.5        | 3532.3     | 58.1      | 130.6      | 451.0      | 108.0       | 672.9       | 1838.5      | 149.4       | 64.9        | 1006.5      | 23631.5     |
| 17 | Male   | 60  | CO              | 24.0    | 0.2        | 1295.5     | 0.0       | 103.7      | 24.6       | 0.0         | 16.3        | 457.3       | 212.4       | 69.0        | 0.0         | 2199.2      |
| 18 | Male   | 40  | CO              | 25.6    | 0.3        | 1659.7     | 0.0       | 81.3       | 95.1       | 24.8        | 176.5       | 474.3       | 171.9       | 69.8        | 909.9       | 1750.0      |
| 19 | Male   | 50  | CO              | 25.0    | 0.3        | 1343.4     | 174.5     | 66.5       | 192.3      | 13.9        | 320.8       | 685.2       | 221.8       | 130.6       | 319.8       | 1310.9      |
| 20 | Female | 60  | CA              | 22.4    | 35.8       | 9223.8     | 1256.4    | 486.8      | 1093.9     | 1093.3      | 1677.8      | 195.5       | 38.3        | 3284.8      | 5409.6      | 3794.7      |
| 21 | Male   | 64  | CA              | 27.4    | 13.2       | 7277.8     | 252.9     | 269.9      | 900.2      | 352.9       | 1658.4      | 312.2       | 81.5        | 262.2       | 3599.6      | 9108.6      |
| 22 | Male   | 57  | CA              | 10.4    | 60.2       | 6633.7     | 1171.6    | 229.0      | 516.8      | 305.6       | 1750.0      | 598.2       | 31.8        | 7922.5      | 3897.8      | 4543.7      |
| 23 | Male   | 73  | CA              | 16.3    | 42.6       | 9476.0     | 1745.5    | 232.1      | 555.6      | 773.3       | 1397.0      | 1425.7      | 18.8        | 5757.3      | 3465.4      | 3067.3      |
| 24 | Male   | 40  | UA              | 1.4     | 0.0        | 483.8      | 26.8      | 2.3        | 1.3        | 0.0         | 96.5        | 2813.0      | 637.2       | 227.5       | 0.0         | 211.4       |
| 25 | Male   | 58  | UA              | 0.6     | 0.0        | 762.3      | 144.9     | 1.3        | 0.9        | 0.0         | 0.0         | 850.0       | 147.7       | 324.3       | 0.0         | 33.7        |
| 26 | Female | 77  | Mixed CO and CA | 26.2    | 0.3        | 1599.0     | 0.0       | 46.7       | 129.0      | 0.1         | 395.4       | 859.5       | 143.8       | 74.8        | 1620.9      | 2045.8      |
| 27 | Male   | 47  | Mixed CO and CA | 28.4    | 2.5        | 5864.3     | 297.8     | 248.7      | 616.8      | 451.2       | 992.0       | 337.7       | 187.3       | 171.2       | 4536.9      | 6743.0      |
| 28 | Male   | 66  | Mixed CO and CA | 25.4    | 0.0        | 2292.6     | 0.0       | 55.7       | 12.3       | 0.0         | 0.0         | 278.7       | 98.4        | 245.1       | 0.0         | 672.1       |
| 29 | Male   | 50  | Mixed CO and UA | 16.8    | 0.1        | 897.0      | 0.0       | 44.5       | 16.5       | 0.0         | 42.4        | 1690.7      | 288.1       | 143.6       | 0.0         | 1597.5      |
| 30 | Male   | 75  | Mixed CO and UA | 6.8     | 0.0        | 818.9      | 61.9      | 13.3       | 3.6        | 0.0         | 52.2        | 2040.0      | 443.3       | 243.2       | 0.0         | 420.0       |

CO: calcium oxalate; CA: carbonate apatite; UA: uric acid;

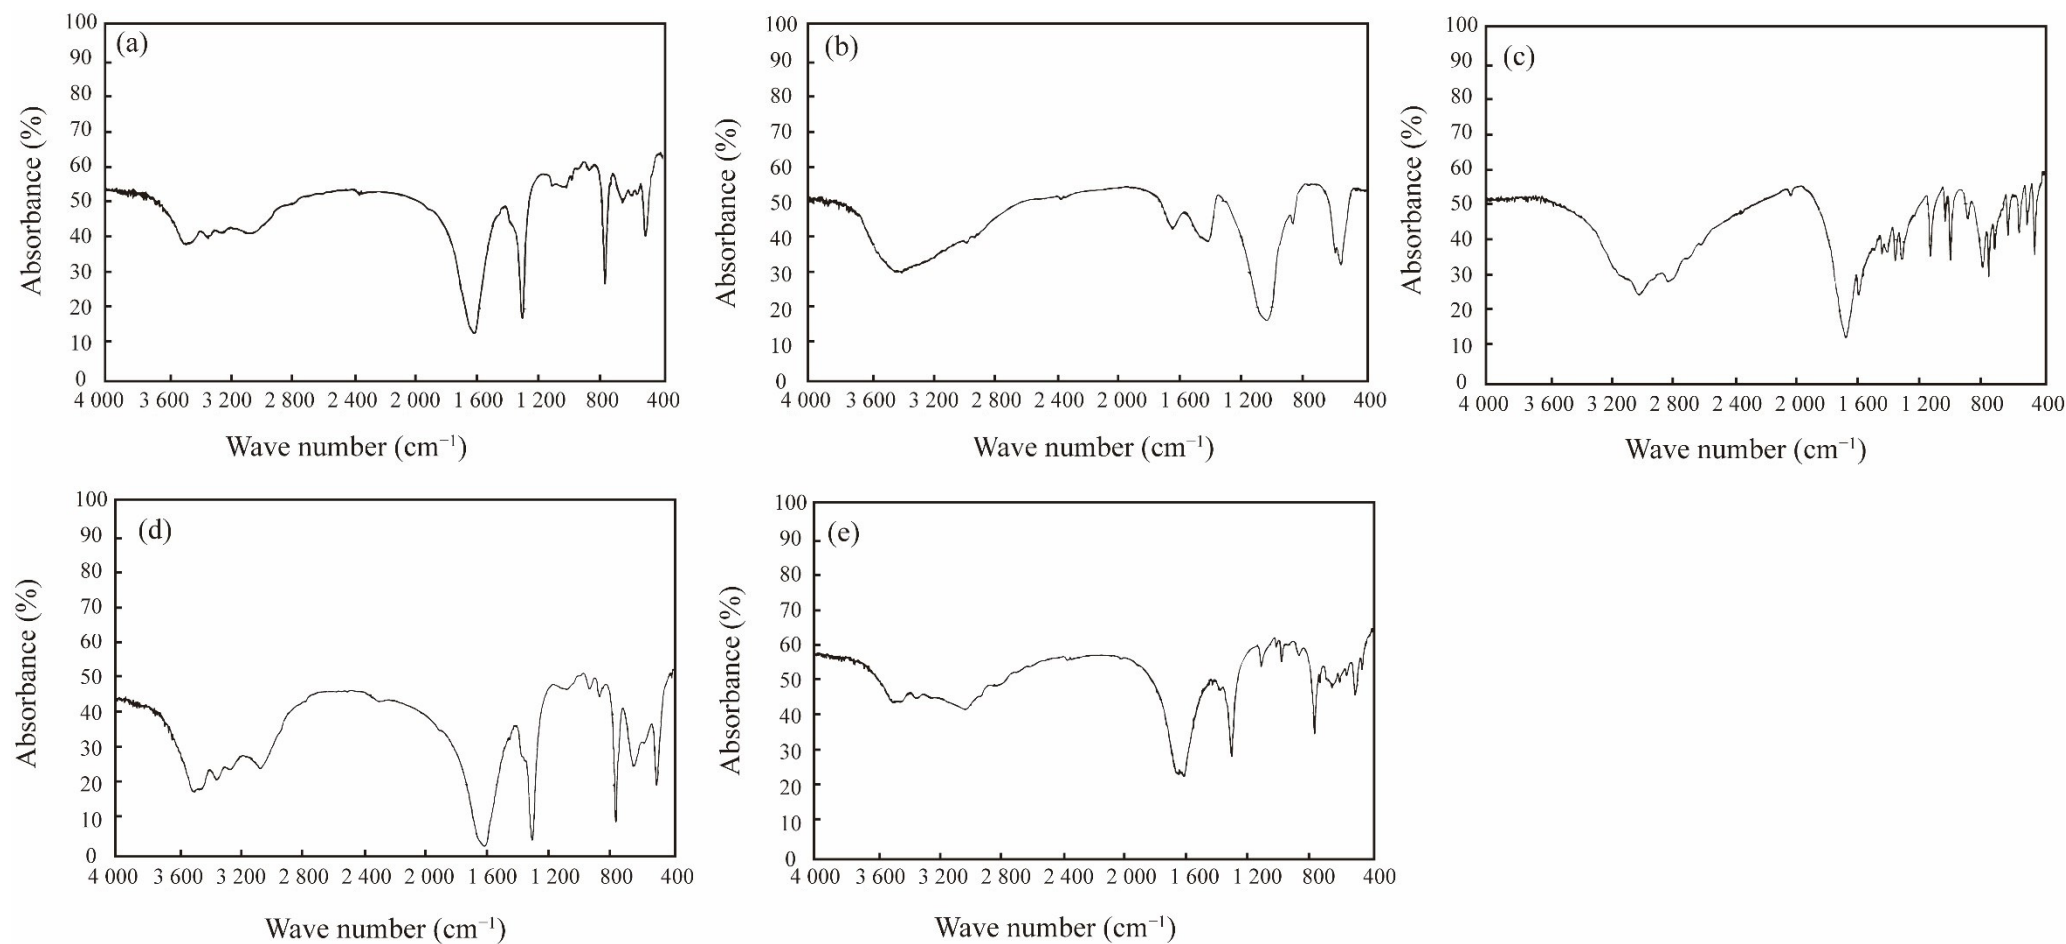

**Figure S1.** Infrared spectra of kidney stones as follows: (a) calcium oxalate; (b) carbonate apatite; (c) uric acid; (d) mixed calcium oxalate and carbonate apatite; (e) mixed calcium oxalate and uric acid.
